# Supplementary material
Source: MDPI journal article supplement (https://www.mdpi.com/2077-1312/4/4/66)
Supplement: s1 [file s1]

## Sheet: Macrofouling
Organism / Taxon	Stage of Development	Substratum, type of coating, other conditions	Coating (major groups)	Adhesion Strength			Rejection rate	Measurement Method	Authors	Year	Notes
				[MPa]			[%]
Barnacles	Adult	Interspeed® 640	Ablative	0.53	±	0.18	unknown	ASTM D5618-94	Tribou & Swain	2015	Basal plate area > 183 mm2. No shell breakage was reported for these coatings; this apparentely only happened when measuring adhesion on epoxy surfaces and these strength results were thus not reported. Location: Port Canaveral, Florida, USA.
Amphibalanus eburneus	Adult (20 days)	Epoxy	Epoxy	2.23	±	0.55	unknown	ASTM D5618-94	Swain & Schultz	1996	Measurements were considered valid for a base plate removal >90%.
Amphibalanus eburneus	Adult (> 20 mm2)	Epoxy (caged)	Epoxy	0.711	±	0.227475	unknown	ASTM D5618-94	Swain et al.	1998	Basal diameter ranged 5 to 20 mm (basal area from 20 to 315 mm2).
Amphibalanus eburneus	Adult (> 20 mm2)	Epoxy (uncaged)	Epoxy	1.157	±	0.304581	unknown	ASTM D5618-94	Swain et al.	1998	Basal diameter ranged 5 to 20 mm (basal area from 20 to 315 mm2).
Amphibalanus eburneus	Adult	F152 Epoxy (location: Florida)	Epoxy	0.939411	±	0.186439	unknown	ASTM D5618-94	Swain et al.	2000	Measurements were considered valid for a base plate removal >90%.
Balanus amphitrite	Adult	F152 Epoxy (location: Italy)	Epoxy	0.435059	±	0.108606	unknown	ASTM D5618-94	Swain et al.	2000	Measurements were considered valid for a base plate removal >90%.
Balanus amphitrite	Adult	F152 Epoxy (location: Singapore)	Epoxy	0.29846	±	0.152724	unknown	ASTM D5618-94	Swain et al.	2000	Measurements were considered valid for a base plate removal >90%.
Balanus glandula	Adult	F152 Epoxy (location: California)	Epoxy	0.696335	±	0.66494	unknown	ASTM D5618-94	Swain et al.	2000	Measurements were considered valid for a base plate removal >90%.
Amphibalanus eburneus	Adult	Intersleek (location: Florida)	Silicone FR	0.0725585	±	0.0270227	unknown	ASTM D5618-94	Swain et al.	2000	Measurements were considered valid for a base plate removal >90%.
Amphibalanus eburneus	Adult (25 months)	RTV 3140	Silicone FR	0.12	±	0.04	unknown	ASTM D5618-94	Swain & Schultz	1996	Measurements were considered valid for a base plate removal >90%.
Amphibalanus eburneus	Adult	RTV 3140 (location: Florida)	Silicone FR	0.530104	±	0.250846	unknown	ASTM D5618-94	Swain et al.	2000	Measurements were considered valid for a base plate removal >90%.
Amphibalanus eburneus	Adult	RTV11	Silicone FR	0.067	±	0.031	unknown	ASTM D5618-94	Wood et al.	2000	Location: Florida Institute of Technology, USA.
Amphibalanus eburneus	Adult	RTV11 (location: Florida)	Silicone FR	0.137749	±	0.0558918	unknown	ASTM D5618-94	Swain et al.	2000	Measurements were considered valid for a base plate removal >90%.
Balanus amphitrite	Adult (reattached for 14 days)	Dow Corning® 3140	Silicone FR	0.190223	±	0.109777	unknown	based on ASTM D5618-94	Sommer et al.	2010	Adult barnacles were allowed to reattach to the surface 2 weeks prior to testing.
Balanus amphitrite	Adult	Intersleek IN5 (location: Hawaii)	Silicone FR	0.0441748	±	0.0118932	unknown	ASTM D5618-94	Swain et al.	2000	Measurements were considered valid for a base plate removal >90%.
Balanus amphitrite	Adult	Intersleek IN5 (location: Italy)	Silicone FR	0.113104	±	0.0237271	unknown	ASTM D5618-94	Swain et al.	2000	Measurements were considered valid for a base plate removal >90%.
Balanus amphitrite	Adult	Intersleek IN5 (location: Singapore)	Silicone FR	0.212319	±	0.325826	unknown	ASTM D5618-94	Swain et al.	2000	Measurements were considered valid for a base plate removal >90%.
Balanus amphitrite	Adult (reattached for 1 week)	Intersleek®	Silicone FR	0.0658516	±	0.0118308	unknown	based on ASTM D5618-94	Majumdar et al.	2007	Measurements were considered valid for 100% removal of the base plate.
Balanus amphitrite	Adult (reattached for 2 weeks)	Intersleek®	Silicone FR	0.08223	±	0.0271777	unknown	based on ASTM D5618-94	Chen et al.	2008	Adult barnacles were allowed to reattach to the surface 2 weeks prior to testing.
Balanus amphitrite	Adult (reattached for 2 weeks)	Intersleek® 700	Silicone FR	0.0840865	±	0.0310867	0	based on ASTM D5618-94	Webster et al.	2010	Adult barnacles were allowed to reattach to the surface 2 weeks prior to testing.
Balanus amphitrite	Adult (reattached for 2 weeks)	Intersleek® 900	Silicone FR	0.041783	±	0.0225323	0	based on ASTM D5618-94	Webster et al.	2010	Adult barnacles were allowed to reattach to the surface 2 weeks prior to testing.
Balanus amphitrite	Adult (reattached for 14 days)	Intersleek® 700	Silicone FR	0.0368715	±	0.0167598	unknown	based on ASTM D5618-94	Sommer et al.	2010	Adult barnacles were allowed to reattach to the surface 2 weeks prior to testing.
Balanus amphitrite	Adult (reattached for 4 weeks)	Intersleek® 700	Silicone FR	0.0705139	±	0.0279835	0	based on ASTM D5618-94	Webster et al.	2010	Results shown here for complete removal of basal plates (0% rejection rate). Adult barnacles were allowed to reattach to the surface 4 weeks prior to testing.
Balanus amphitrite	Adult (reattached for 4 weeks)	Intersleek® 900	Silicone FR	0.0694058	±	0.0310867	0	based on ASTM D5618-94	Webster et al.	2010	Results shown here for complete removal of basal plates (0% rejection rate). Adult barnacles were allowed to reattach to the surface 4 weeks prior to testing.
Balanus amphitrite	Adult	RTV 3140 (location: Hawaii)	Silicone FR	0.222573	±	0.10534	unknown	ASTM D5618-94	Swain et al.	2000	Measurements were considered valid for a base plate removal >90%.
Balanus amphitrite	Adult	RTV 3140 (location: Italy)	Silicone FR	0.263233	±	0.0797709	unknown	ASTM D5618-94	Swain et al.	2000	Measurements were considered valid for a base plate removal >90%.
Balanus amphitrite	Adult	RTV 3140 (location: Singapore)	Silicone FR	0.326883	±	0.32751	unknown	ASTM D5618-94	Swain et al.	2000	Measurements were considered valid for a base plate removal >90%.
Balanus amphitrite	Adult	RTV11 (location: Hawaii)	Silicone FR	0.169903	±	0.0951456	unknown	ASTM D5618-94	Swain et al.	2000	Measurements were considered valid for a base plate removal >90%.
Balanus amphitrite	Adult	RTV11 (location: Italy)	Silicone FR	0.183158	±	0.025376	unknown	ASTM D5618-94	Swain et al.	2000	Measurements were considered valid for a base plate removal >90%.
Balanus amphitrite	Adult	RTV11 (location: Singapore)	Silicone FR	0.119426	±	0.0712725	unknown	ASTM D5618-94	Swain et al.	2000	Measurements were considered valid for a base plate removal >90%.
Balanus amphitrite	Adult (reattached for 2 weeks)	Silastic® 3140	Silicone FR	0.234146	±	0.0376307	unknown	based on ASTM D5618-94	Chen et al.	2008	Adult barnacles were allowed to reattach to the surface 2 weeks prior to testing.
Balanus amphitrite	Adult (reattached for 2 weeks)	Silastic® T2	Silicone FR	0.274564	±	0.0675958	unknown	based on ASTM D5618-94	Chen et al.	2008	Adult barnacles were allowed to reattach to the surface 2 weeks prior to testing.
Balanus amphitrite	Adult (reattached for 14 days)	Silastic® T2	Silicone FR	0.160894	±	0.114804	unknown	based on ASTM D5618-94	Sommer et al.	2010	Adult barnacles were allowed to reattach to the surface 2 weeks prior to testing.
Balanus amphitrite	Adult (reattached for 2 weeks)	Silastic® T2	Silicone FR	0.226291	±	0.0373077	14	based on ASTM D5618-94	Webster et al.	2010	Adult barnacles were allowed to reattach to the surface 2 weeks prior to testing.
Balanus amphitrite	Adult (reattached for 4 weeks)	Silastic® T2	Silicone FR	0.166356	±	0.0776734	0	based on ASTM D5618-94	Webster et al.	2010	Results shown here for complete removal of basal plates (0% rejection rate). Adult barnacles were allowed to reattach to the surface 4 weeks prior to testing.
Balanus amphitrite	Adult	Silastic® T2	Silicone FR	0.149			unknown	based on ASTM D5618-94	Wang et al.	2011	Results shown here for complete removal of basal plates (0% rejection rate). Adult barnacles were allowed to reattach to the surface 4 weeks prior to testing.
Balanus glandula	Adult	Intersleek (location: California)	Silicone FR	0.0778237	±	0.0406714	unknown	ASTM D5618-94	Swain et al.	2000	Measurements were considered valid for a base plate removal >90%.
Balanus glandula	Adult	RTV 3140 (location: California)	Silicone FR	0.226149	±	0.143388	unknown	ASTM D5618-94	Swain et al.	2000	Measurements were considered valid for a base plate removal >90%.
Balanus glandula	Adult	RTV11 (location: California)	Silicone FR	0.14218	±	0.063545	unknown	ASTM D5618-94	Swain et al.	2000	Measurements were considered valid for a base plate removal >90%.
Barnacles	Adult	Intersleek® 700	Silicone FR	0.05	±	0.02	unknown	ASTM D5618-94	Tribou & Swain	2015	Basal plate area > 183 mm2. No shell breakage was reported for these coatings; this apparentely only happened when measuring adhesion on epoxy surfaces and these strength results were thus not reported. Location: Port Canaveral, Florida, USA.
Barnacles	Adult	Intersleek® 900	Silicone FR	0.03	±	0.02	unknown	ASTM D5618-94	Tribou & Swain	2015	Basal plate area > 183 mm2. No shell breakage was reported for these coatings; this apparentely only happened when measuring adhesion on epoxy surfaces and these strength results were thus not reported. Location: Port Canaveral, Florida, USA.
Oysters (subtropical estuarine)	Adult	RTV11	Silicone FR	0.103	±	0.045	unknown	ASTM D5618-94	Wood et al.	2000	Location: Florida Institute of Technology, USA.
Oysters (tropical marine)	Adult	RTV11	Silicone FR	0.131	±	0.069	unknown	ASTM D5618-94	Wood et al.	2000	Location: University of Hawaii, USA.
Tubeworms	Adult	Intersleek® 700	Silicone FR	0.06	±	0.03	unknown	ASTM D5618-94	Tribou & Swain	2015	Area > 135 mm2. Location: Port Canaveral, Florida, USA.
Tubeworms	Adult	Intersleek® 900	Silicone FR	0.09	±	0.05	unknown	ASTM D5618-94	Tribou & Swain	2015	Area > 135 mm2. Location: Port Canaveral, Florida, USA.
Tubeworms (subtropical estuarine)	Adult	RTV11	Silicone FR	0.097	±	0.025	unknown	ASTM D5618-94	Wood et al.	2000	Location: Florida Institute of Technology, USA.
Tubeworms (tropical marine)	Adult	RTV11	Silicone FR	0.116	±	0.081	unknown	ASTM D5618-94	Wood et al.	2000	Location: University of Hawaii, USA.

## Sheet: Microfouling (80% removal)
Organism / Taxon	Stage of Development	Substratum, type of coating, other conditions	Surface impact pressure [kPa]			Shear stress			Approx. Shear?	Removal			Shear stress			Measurement Method	Authors	Year	Notes
	(contact time)					[Pa]				[%]			[Pa]
Amphora coffeaeformis	Adhered cells (2 h)	PDMS Silastic® T2				36.987			0	84.109	±	4.93062	36.987			Tubulent channel flow apparatus (Schultz et al. 2000)	Holland et al.	2004	Shear stress applied for 5 min.
Amphora coffeaeformis	Adhered cells (2 h)	PDMS Silastic® T2				52.9358			0	80.6441	±	6.16161	52.9358			Tubulent channel flow apparatus (Schultz et al. 2000)	Holland et al.	2004	Shear stress applied for 5 min.
Navicula incerta	Adhered cells (2 h)	Dow Corning® 3140	43			13			1	86.7228	±	2.08239	13			Automated water jet apparatus for multiwell plates (Ekin et al. 2007)	Sommer et al.	2010	Water jet applied for 10 s, completing approx.. 20 rotations of the nozzle (rotation diameter of 7 mm). Originally reported jet impact pressure values have been converted to estimated maximum shear stress using a formula presented in Finlay et al. 2002a, considering a nozzle diameter of 0.76 mm and distance from nozzle to surface of 25 mm (Stafslien et al. 2007). Thus, the following formula appli…
Navicula incerta	Adhered cells (2 h)	Intersleek® 700 (biofilmed, NSW)				40			0	80.4124	±	4.63917	40			Tubulent channel flow apparatus (Schultz et al. 2000)	Mieskin et al.	2012	Shear stress applied for 5 min. NSW = Natural Sea Water. Differences between the same type of non-biofilmed control surfaces may be due to different conditioning layers associated with different media: filtered natural sea water, for comparison with NSW biofilms, and sterile culture medium, for comparison with C. marina biofilms.
Navicula incerta	Adhered cells (2 h)	PDMS (biofilmed, NSW)				40			0	87.1134	±	2.57732	40			Tubulent channel flow apparatus (Schultz et al. 2000)	Mieskin et al.	2012	Shear stress applied for 5 min. NSW = Natural Sea Water. Differences between the same type of non-biofilmed control surfaces may be due to different conditioning layers associated with different media: filtered natural sea water, for comparison with NSW biofilms, and sterile culture medium, for comparison with C. marina biofilms.
Navicula incerta	Adhered cells (2 h)	PDMS 1,000 g/mol, 10% PDMS	43			13			1	95.0038	±	3.84728	13			Automated water jet apparatus for multiwell plates (Ekin et al. 2007)	Sommer et al.	2010	Water jet applied for 10 s, completing approx.. 20 rotations of the nozzle (rotation diameter of 7 mm). Originally reported jet impact pressure values have been converted to estimated maximum shear stress using a formula presented in Finlay et al. 2002a, considering a nozzle diameter of 0.76 mm and distance from nozzle to surface of 25 mm (Stafslien et al. 2007). Thus, the following formula appli…
Navicula incerta	Adhered cells (2 h)	Silastic® T2	43			13			1	88.7913	±	1.12274	13			Automated water jet apparatus for multiwell plates (Ekin et al. 2007)	Sommer et al.	2010	Water jet applied for 10 s, completing approx.. 20 rotations of the nozzle (rotation diameter of 7 mm). Originally reported jet impact pressure values have been converted to estimated maximum shear stress using a formula presented in Finlay et al. 2002a, considering a nozzle diameter of 0.76 mm and distance from nozzle to surface of 25 mm (Stafslien et al. 2007). Thus, the following formula appli…
Navicula perminuta	Adhered cells (2 h)	PDMS Silastic® T2	210			275			1	100			275			Water jet apparatus (Finlay et al. 2002a)	Holland et al.	2004	Originally reported jet impact pressure values have been converted to estimated maximum shear stress using a formula presented in Finlay et al. 2002a. Thus, assuming similar test conditions, the following formula applies: τmax [Pa] ≈ 0.0013 • (jet impact pressure in Pa).
Navicula incerta	Biofilm (2 days)	Intersleek® 700	64			85			1	100			85			Water jet apparatus (?)	Sommer et al.	2010	Originally reported jet impact pressure values have been converted to estimated maximum shear stress using a formula presented in Finlay et al. 2002a. Details of the water jet apparatus are not given. However, assuming similar test conditions, the following formula applies: τmax [Pa] ≈ 0.0013 • (jet impact pressure in Pa). In this study, removal percentage was visually estimated.
Navicula incerta	Biofilm (2 days)	PDMS 1,000 g/mol, 10% PDMS	64			85			1	100			85			Water jet apparatus (?)	Sommer et al.	2010	Originally reported jet impact pressure values have been converted to estimated maximum shear stress using a formula presented in Finlay et al. 2002a. Details of the water jet apparatus are not given. However, assuming similar test conditions, the following formula applies: τmax [Pa] ≈ 0.0013 • (jet impact pressure in Pa). In this study, removal percentage was visually estimated.
Navicula incerta	Biofilm (2 days)	PDMS 1,000 g/mol, 5% PDMS	64			85			1	100			85			Water jet apparatus (?)	Sommer et al.	2010	Originally reported jet impact pressure values have been converted to estimated maximum shear stress using a formula presented in Finlay et al. 2002a. Details of the water jet apparatus are not given. However, assuming similar test conditions, the following formula applies: τmax [Pa] ≈ 0.0013 • (jet impact pressure in Pa). In this study, removal percentage was visually estimated.
Navicula incerta	Biofilm (2 days)	PDMS 5,000 g/mol, 10% PDMS	64			85			1	90			85			Water jet apparatus (?)	Sommer et al.	2010	Originally reported jet impact pressure values have been converted to estimated maximum shear stress using a formula presented in Finlay et al. 2002a. Details of the water jet apparatus are not given. However, assuming similar test conditions, the following formula applies: τmax [Pa] ≈ 0.0013 • (jet impact pressure in Pa). In this study, removal percentage was visually estimated.
Ulva linza	Sporelings (6 days)	Intersleek® 900				50			0	92.492	±	2.42617	50			Tubulent channel flow apparatus (Schultz et al. 2000)	Evariste et al.	2012	Shear stress applied for 5 min.
Ulva linza	Sporelings (6 days)	PDMS 10,000 g/mol, EC, 0 x ε-CL/hydroxyl	93			120			1	99			120			Water jet apparatus (Finlay et al. 2002a) adapted for array panels (Cassé et al. 2007)	Ekin et al.	2007	Range of impact pressure values was 34 to 210 kPa. Please refer to the study for complete results in terms of (% removal) versus (impact pressure) and (coating). Originally reported jet impact pressure values have been converted to estimated maximum shear stress using a formula presented in Finlay et al. 2002a. Thus, assuming similar test conditions, the following formula applies: τmax [Pa] ≈ 0.0…
Ulva linza	Sporelings (6 days)	PDMS 10,000 g/mol, EC, 3 x ε-CL/hydroxyl	93			120			1	99			120			Water jet apparatus (Finlay et al. 2002a) adapted for array panels (Cassé et al. 2007)	Ekin et al.	2007	Range of impact pressure values was 34 to 210 kPa. Please refer to the study for complete results in terms of (% removal) versus (impact pressure) and (coating). Originally reported jet impact pressure values have been converted to estimated maximum shear stress using a formula presented in Finlay et al. 2002a. Thus, assuming similar test conditions, the following formula applies: τmax [Pa] ≈ 0.0…
Ulva linza	Sporelings (6 days)	PDMS 10,000 g/mol, GC, 3 x ε-CL/hydroxyl	132			170			1	99			170			Water jet apparatus (Finlay et al. 2002a) adapted for array panels (Cassé et al. 2007)	Ekin et al.	2007	Range of impact pressure values was 34 to 210 kPa. Please refer to the study for complete results in terms of (% removal) versus (impact pressure) and (coating). Originally reported jet impact pressure values have been converted to estimated maximum shear stress using a formula presented in Finlay et al. 2002a. Thus, assuming similar test conditions, the following formula applies: τmax [Pa] ≈ 0.0…
Ulva linza	Sporelings (6 days)	PDMS 35,000 g/mol, EC, 0 x ε-CL/hydroxyl	132			170			1	99			170			Water jet apparatus (Finlay et al. 2002a) adapted for array panels (Cassé et al. 2007)	Ekin et al.	2007	Range of impact pressure values was 34 to 210 kPa. Please refer to the study for complete results in terms of (% removal) versus (impact pressure) and (coating). Originally reported jet impact pressure values have been converted to estimated maximum shear stress using a formula presented in Finlay et al. 2002a. Thus, assuming similar test conditions, the following formula applies: τmax [Pa] ≈ 0.0…
Ulva linza	Sporelings (6 days)	Silastic® T2	210			275			1	85.9155			275			Water jet apparatus (Finlay et al. 2002a) coupled with digital image analysis	Cassé et al.	2007	Semi-high-throughput method (less rigorous than Finlay et al 2002a). Originally reported jet impact pressure values have been converted to estimated maximum shear stress using a formula presented in Finlay et al. 2002a. Thus, assuming similar test conditions, the following formula applies: τmax [Pa] ≈ 0.0013 • (jet impact pressure in Pa). The first set of values for 50% removal have been interpol…
Ulva linza	Sporelings (6 days)	Silicon rubber A	93			120			1	99			120			Water jet apparatus (Finlay et al. 2002a) adapted for array panels (Cassé et al. 2007)	Ekin et al.	2007	Range of impact pressure values was 34 to 210 kPa. Please refer to the study for complete results in terms of (% removal) versus (impact pressure) and (coating). Originally reported jet impact pressure values have been converted to estimated maximum shear stress using a formula presented in Finlay et al. 2002a. Thus, assuming similar test conditions, the following formula applies: τmax [Pa] ≈ 0.0…
Ulva linza	Sporelings (6 days)	Silicon rubber B	93			120			1	99			120			Water jet apparatus (Finlay et al. 2002a) adapted for array panels (Cassé et al. 2007)	Ekin et al.	2007	Range of impact pressure values was 34 to 210 kPa. Please refer to the study for complete results in terms of (% removal) versus (impact pressure) and (coating). Originally reported jet impact pressure values have been converted to estimated maximum shear stress using a formula presented in Finlay et al. 2002a. Thus, assuming similar test conditions, the following formula applies: τmax [Pa] ≈ 0.0…
Ulva linza	Sporelings (7 days)	Intersleek® 900				10			0	87.5312	±	6.98255	10			Tubulent channel flow apparatus (Schultz et al. 2000)	Mieskin et al.	2012	Shear stress applied for 5 min. NSW = Natural Sea Water. Differences between the same type of non-biofilmed control surfaces may be due to different conditioning layers associated with different media: filtered natural sea water, for comparison with NSW biofilms, and sterile culture medium, for comparison with C. marina biofilms. Additionaly, different batches of spores were used, giving rise to …
Ulva linza	Sporelings (7 days)	PDMS 10,000 g/mol, 10% PDMS	67			20			1	85.9101	±	5.26316	20			Automated water jet apparatus for multiwell plates (Ekin et al. 2007)	Sommer et al.	2010	No direct reference to exposure time (probably 10 s). Originally reported jet impact pressure values have been converted to estimated maximum shear stress using a formula presented in Finlay et al. 2002a, considering a nozzle diameter of 0.76 mm and distance from nozzle to surface of 25 mm (Stafslien et al. 2007). Thus, the following formula applies: τmax [Pa] ≈ 0.00030 • (jet impact pressure in …
Ulva linza	Sporelings (7 days)	PDMS 10,000 g/mol, 10% PDMS	111			33			1	82.4013	±	6.6886	33			Automated water jet apparatus for multiwell plates (Ekin et al. 2007)	Sommer et al.	2010	No direct reference to exposure time (probably 10 s). Originally reported jet impact pressure values have been converted to estimated maximum shear stress using a formula presented in Finlay et al. 2002a, considering a nozzle diameter of 0.76 mm and distance from nozzle to surface of 25 mm (Stafslien et al. 2007). Thus, the following formula applies: τmax [Pa] ≈ 0.00030 • (jet impact pressure in …
Ulva linza	Sporelings (7 days)	PDMS 15,000 g/mol, 5% PDMS	67			20			1	82.6206	±	3.28948	20			Automated water jet apparatus for multiwell plates (Ekin et al. 2007)	Sommer et al.	2010	No direct reference to exposure time (probably 10 s). Originally reported jet impact pressure values have been converted to estimated maximum shear stress using a formula presented in Finlay et al. 2002a, considering a nozzle diameter of 0.76 mm and distance from nozzle to surface of 25 mm (Stafslien et al. 2007). Thus, the following formula applies: τmax [Pa] ≈ 0.00030 • (jet impact pressure in …
Ulva linza	Sporelings (7 days)	PDMS 15,000 g/mol, 5% PDMS	111			33			1	84.9232	±	3.07017	33			Automated water jet apparatus for multiwell plates (Ekin et al. 2007)	Sommer et al.	2010	No direct reference to exposure time (probably 10 s). Originally reported jet impact pressure values have been converted to estimated maximum shear stress using a formula presented in Finlay et al. 2002a, considering a nozzle diameter of 0.76 mm and distance from nozzle to surface of 25 mm (Stafslien et al. 2007). Thus, the following formula applies: τmax [Pa] ≈ 0.00030 • (jet impact pressure in …
Ulva linza	Sporelings (7 days)	Silastic® T2	111			33			1	88.5417	±	6.25	33			Automated water jet apparatus for multiwell plates (Ekin et al. 2007)	Sommer et al.	2010	No direct reference to exposure time (probably 10 s). Originally reported jet impact pressure values have been converted to estimated maximum shear stress using a formula presented in Finlay et al. 2002a, considering a nozzle diameter of 0.76 mm and distance from nozzle to surface of 25 mm (Stafslien et al. 2007). Thus, the following formula applies: τmax [Pa] ≈ 0.00030 • (jet impact pressure in …
Ulva linza	Sporelings (8 days)	PDMS, E = 0.2 MPa, Thickness = 100 μm				55			0	81.8691	±	5.5797	55			Tubulent channel flow apparatus (Schultz et al. 2000)	Chaudhury et al.	2005	Shear stress applied for 5 min.
Ulva linza	Sporelings (8 days)	PDMS, E = 0.8 MPa, Thickness = 100 μm				55			0	81.019	±	4.29184	55			Tubulent channel flow apparatus (Schultz et al. 2000)	Chaudhury et al.	2005	Shear stress applied for 5 min.
Ulva linza	Sporelings (8 days)	PDMS, E = 0.8 MPa, Thickness = 100 μm				55			0	80.9109	±	4.20622	55			Tubulent channel flow apparatus (Schultz et al. 2000)	Chaudhury et al.	2005	Shear stress applied for 5 min.
Ulva linza	Sporelings (8 days)	PDMS, E = 0.8 MPa, Thickness = 430 μm				55			0	82.7177	±	4.42784	55			Tubulent channel flow apparatus (Schultz et al. 2000)	Chaudhury et al.	2005	Shear stress applied for 5 min.
Ectocarpus crouaniorum	Sporelings (14 days)	Intersleek® 900				8			0	93.7269	±	3.56704	8			Tubulent channel flow apparatus (Schultz et al. 2000)	Evariste et al.	2012	Shear stress applied for 5 min.
Ectocarpus sp.	Sporelings (14 days)	Intersleek® 900				8			0	97.1951	±	1.21952	8			Tubulent channel flow apparatus (Schultz et al. 2000)	Evariste et al.	2012	Shear stress applied for 5 min.
Hincksia secunda	Sporelings (14 days)	Intersleek® 700				8			0	87.1481	±	3.54958	8			Tubulent channel flow apparatus (Schultz et al. 2000)	Evariste et al.	2012	Shear stress applied for 5 min.
Hincksia secunda	Sporelings (14 days)	Intersleek® 900				8			0	92.7785	±	2.69278	8			Tubulent channel flow apparatus (Schultz et al. 2000)	Evariste et al.	2012	Shear stress applied for 5 min.
SUMMARY TABLE
Stage	Organism	Average shear stress [Pa]	Std. Dev.
Adhered cells (2 h)	Amphora coffeaeformis	44.9614	11.2775
	Navicula incerta	23.8	14.7885
	Navicula perminuta	275	0
Biofilm (2 days)	Navicula incerta	85	0
Sporelings (6 days)	Ulva linza	143.125	65.0789
Sporelings (7 days)	Ulva linza	24.8333	9.66264
Sporelings (8 days)	Ulva linza	55	0
Sporelings (14 days)	Ectocarpus crouaniorum	8	0
	Ectocarpus sp.	8	0
	Hincksia secunda	8	0

## Sheet: Microfouling (50% removal)
Organism / Taxon	Stage of Development	Substratum, type of coating, other conditions	Surface impact pressure	Shear stress	Removal			Measurement Method	Reference	Year	Notes
	(contact time)		[kPa]	[Pa]	[%]
Craspedostauros australis	Adhered cells (2 h)	PDMS Silastic® T2		24.9739	65.2564	±	2.43502	Tubulent channel flow apparatus (Schultz et al. 2000)	Holland et al.	2004	Shear stress applied for 5 min.
Amphora coffeaeformis	Adhered cells (2 h)	PDMS Silastic® T2		36.987	84.109	±	4.93062	Tubulent channel flow apparatus (Schultz et al. 2000)	Holland et al.	2004	Shear stress applied for 5 min.
Amphora coffeaeformis	Adhered cells (2 h)	PDMS Silastic® T2		52.9358	80.6441	±	6.16161	Tubulent channel flow apparatus (Schultz et al. 2000)	Holland et al.	2004	Shear stress applied for 5 min.
Navicula incerta	Adhered cells (2 h)	Dow Corning® 3140	43	13	86.7228	±	2.08239	Automated water jet apparatus for multiwell plates (Ekin et al. 2007)	Sommer et al.	2010	Water jet applied for 10 s, completing approx.. 20 rotations of the nozzle (rotation diameter of 7 mm). Originally reported jet impact pressure values have been converted to estimated maximum shear stress using a formula presented in Finlay et al. 2002a, considering a nozzle diameter of 0.76 mm and distance from nozzle to surface of 25 mm (Stafslien et al. 2007). Thus, the following formula appli…
Navicula incerta	Adhered cells (2 h)	Intersleek® 700 (biofilmed, C. marina)		40	50.5155	±	7.2165	Tubulent channel flow apparatus (Schultz et al. 2000)	Mieskin et al.	2012	Shear stress applied for 5 min. NSW = Natural Sea Water. Differences between the same type of non-biofilmed control surfaces may be due to different conditioning layers associated with different media: filtered natural sea water, for comparison with NSW biofilms, and sterile culture medium, for comparison with C. marina biofilms.
Navicula incerta	Adhered cells (2 h)	Intersleek® 700 (biofilmed, NSW)		40	80.4124	±	4.63917	Tubulent channel flow apparatus (Schultz et al. 2000)	Mieskin et al.	2012	Shear stress applied for 5 min. NSW = Natural Sea Water. Differences between the same type of non-biofilmed control surfaces may be due to different conditioning layers associated with different media: filtered natural sea water, for comparison with NSW biofilms, and sterile culture medium, for comparison with C. marina biofilms.
Navicula incerta	Adhered cells (2 h)	PDMS (biofilmed, C. marina)		40	79.3815	±	3.60824	Tubulent channel flow apparatus (Schultz et al. 2000)	Mieskin et al.	2012	Shear stress applied for 5 min. NSW = Natural Sea Water. Differences between the same type of non-biofilmed control surfaces may be due to different conditioning layers associated with different media: filtered natural sea water, for comparison with NSW biofilms, and sterile culture medium, for comparison with C. marina biofilms.
Navicula incerta	Adhered cells (2 h)	PDMS (biofilmed, NSW)		40	87.1134	±	2.57732	Tubulent channel flow apparatus (Schultz et al. 2000)	Mieskin et al.	2012	Shear stress applied for 5 min. NSW = Natural Sea Water. Differences between the same type of non-biofilmed control surfaces may be due to different conditioning layers associated with different media: filtered natural sea water, for comparison with NSW biofilms, and sterile culture medium, for comparison with C. marina biofilms.
Navicula incerta	Adhered cells (2 h)	PDMS 1,000 g/mol, 10% PDMS	43	13	95.0038	±	3.84728	Automated water jet apparatus for multiwell plates (Ekin et al. 2007)	Sommer et al.	2010	Water jet applied for 10 s, completing approx.. 20 rotations of the nozzle (rotation diameter of 7 mm). Originally reported jet impact pressure values have been converted to estimated maximum shear stress using a formula presented in Finlay et al. 2002a, considering a nozzle diameter of 0.76 mm and distance from nozzle to surface of 25 mm (Stafslien et al. 2007). Thus, the following formula appli…
Navicula incerta	Adhered cells (2 h)	PDMS 1,000 g/mol, 5% PDMS	43	13	64.0881	±	5.9308	Automated water jet apparatus for multiwell plates (Ekin et al. 2007)	Sommer et al.	2010	Water jet applied for 10 s, completing approx.. 20 rotations of the nozzle (rotation diameter of 7 mm). Originally reported jet impact pressure values have been converted to estimated maximum shear stress using a formula presented in Finlay et al. 2002a, considering a nozzle diameter of 0.76 mm and distance from nozzle to surface of 25 mm (Stafslien et al. 2007). Thus, the following formula appli…
Navicula incerta	Adhered cells (2 h)	PDMS 5,000 g/mol, 10% PDMS	43	13	64.0495	±	16.9861	Automated water jet apparatus for multiwell plates (Ekin et al. 2007)	Sommer et al.	2010	Water jet applied for 10 s, completing approx.. 20 rotations of the nozzle (rotation diameter of 7 mm). Originally reported jet impact pressure values have been converted to estimated maximum shear stress using a formula presented in Finlay et al. 2002a, considering a nozzle diameter of 0.76 mm and distance from nozzle to surface of 25 mm (Stafslien et al. 2007). Thus, the following formula appli…
Navicula incerta	Adhered cells (2 h)	Silastic® T2	43	13	88.7913	±	1.12274	Automated water jet apparatus for multiwell plates (Ekin et al. 2007)	Sommer et al.	2010	Water jet applied for 10 s, completing approx.. 20 rotations of the nozzle (rotation diameter of 7 mm). Originally reported jet impact pressure values have been converted to estimated maximum shear stress using a formula presented in Finlay et al. 2002a, considering a nozzle diameter of 0.76 mm and distance from nozzle to surface of 25 mm (Stafslien et al. 2007). Thus, the following formula appli…
Navicula perminuta	Adhered cells (2 h)	PDMS Silastic® T2	180	235	78	±	3	Water jet apparatus (Finlay et al. 2002a)	Holland et al.	2004	Originally reported jet impact pressure values have been converted to estimated maximum shear stress using a formula presented in Finlay et al. 2002a. Thus, assuming similar test conditions, the following formula applies: τmax [Pa] ≈ 0.0013 • (jet impact pressure in Pa).
Navicula perminuta	Adhered cells (2 h)	PDMS Silastic® T2	210	275	100			Water jet apparatus (Finlay et al. 2002a)	Holland et al.	2004	Originally reported jet impact pressure values have been converted to estimated maximum shear stress using a formula presented in Finlay et al. 2002a. Thus, assuming similar test conditions, the following formula applies: τmax [Pa] ≈ 0.0013 • (jet impact pressure in Pa).
Navicula incerta	Adhered cells (24 h)	Intersleek® 900	69	90	62.5513	±	4.47091	Water jet apparatus (?)	Webster et al.	2010	Results presented for 4 week preleaching of the coatings. Originally reported jet impact pressure values have been converted to estimated maximum shear stress using a formula presented in Finlay et al. 2002a. Details of the water jet apparatus are not given. However, assuming similar test conditions, the following formula applies: τmax [Pa] ≈ 0.0013 • (jet impact pressure in Pa).
Navicula incerta	Adhered cells (24 h)	Intersleek® 900	138	180	58.9479	±	5.07049	Water jet apparatus (?)	Webster et al.	2010	Results presented for 4 week preleaching of the coatings. Originally reported jet impact pressure values have been converted to estimated maximum shear stress using a formula presented in Finlay et al. 2002a. Details of the water jet apparatus are not given. However, assuming similar test conditions, the following formula applies: τmax [Pa] ≈ 0.0013 • (jet impact pressure in Pa).
Cellulophaga lytica	Biofilm (18 h)	PDMS 10,000 g/mol, EC, 0 x ε-CL/hydroxyl	18	5	51			Automated water jet apparatus for multiwell plates (Stafslien et al. 2007)	Ekin et al.	2007	Water jet applied for 10 s, completing approx.. 20 rotations of the nozzle (rotation diameter of 7 mm). Originally reported jet impact pressure values have been converted to estimated maximum shear stress using a formula presented in Finlay et al. 2002a, considering a nozzle diameter of 0.76 mm and distance from nozzle to surface of 25 mm (Stafslien et al. 2007). Thus, the following formula appli…
Cellulophaga lytica	Biofilm (18 h)	PDMS 10,000 g/mol, EC, 3 x ε-CL/hydroxyl	18	5	66			Automated water jet apparatus for multiwell plates (Stafslien et al. 2007)	Ekin et al.	2007	Water jet applied for 10 s, completing approx.. 20 rotations of the nozzle (rotation diameter of 7 mm). Originally reported jet impact pressure values have been converted to estimated maximum shear stress using a formula presented in Finlay et al. 2002a, considering a nozzle diameter of 0.76 mm and distance from nozzle to surface of 25 mm (Stafslien et al. 2007). Thus, the following formula appli…
Cellulophaga lytica	Biofilm (18 h)	PDMS 10,000 g/mol, GC, 0 x ε-CL/hydroxyl	18	5	52			Automated water jet apparatus for multiwell plates (Stafslien et al. 2007)	Ekin et al.	2007	Water jet applied for 10 s, completing approx.. 20 rotations of the nozzle (rotation diameter of 7 mm). Originally reported jet impact pressure values have been converted to estimated maximum shear stress using a formula presented in Finlay et al. 2002a, considering a nozzle diameter of 0.76 mm and distance from nozzle to surface of 25 mm (Stafslien et al. 2007). Thus, the following formula appli…
Cellulophaga lytica	Biofilm (18 h)	PDMS 10,000 g/mol, GC, 3 x ε-CL/hydroxyl	18	5	72			Automated water jet apparatus for multiwell plates (Stafslien et al. 2007)	Ekin et al.	2007	Water jet applied for 10 s, completing approx.. 20 rotations of the nozzle (rotation diameter of 7 mm). Originally reported jet impact pressure values have been converted to estimated maximum shear stress using a formula presented in Finlay et al. 2002a, considering a nozzle diameter of 0.76 mm and distance from nozzle to surface of 25 mm (Stafslien et al. 2007). Thus, the following formula appli…
Cellulophaga lytica	Biofilm (18 h)	PDMS 35,000 g/mol, EC, 0 x ε-CL/hydroxyl	18	5	51			Automated water jet apparatus for multiwell plates (Stafslien et al. 2007)	Ekin et al.	2007	Water jet applied for 10 s, completing approx.. 20 rotations of the nozzle (rotation diameter of 7 mm). Originally reported jet impact pressure values have been converted to estimated maximum shear stress using a formula presented in Finlay et al. 2002a, considering a nozzle diameter of 0.76 mm and distance from nozzle to surface of 25 mm (Stafslien et al. 2007). Thus, the following formula appli…
Cellulophaga lytica	Biofilm (18 h)	PDMS 35,000 g/mol, EC, 3 x ε-CL/hydroxyl	18	5	60			Automated water jet apparatus for multiwell plates (Stafslien et al. 2007)	Ekin et al.	2007	Water jet applied for 10 s, completing approx.. 20 rotations of the nozzle (rotation diameter of 7 mm). Originally reported jet impact pressure values have been converted to estimated maximum shear stress using a formula presented in Finlay et al. 2002a, considering a nozzle diameter of 0.76 mm and distance from nozzle to surface of 25 mm (Stafslien et al. 2007). Thus, the following formula appli…
Cellulophaga lytica	Biofilm (18 h)	PDMS 35,000 g/mol, GC, 3 x ε-CL/hydroxyl	18	5	53			Automated water jet apparatus for multiwell plates (Stafslien et al. 2007)	Ekin et al.	2007	Water jet applied for 10 s, completing approx.. 20 rotations of the nozzle (rotation diameter of 7 mm). Originally reported jet impact pressure values have been converted to estimated maximum shear stress using a formula presented in Finlay et al. 2002a, considering a nozzle diameter of 0.76 mm and distance from nozzle to surface of 25 mm (Stafslien et al. 2007). Thus, the following formula appli…
Cellulophaga lytica	Biofilm (18 h)	Silicon rubber A	18	5	55			Automated water jet apparatus for multiwell plates (Stafslien et al. 2007)	Ekin et al.	2007	Water jet applied for 10 s, completing approx.. 20 rotations of the nozzle (rotation diameter of 7 mm). Originally reported jet impact pressure values have been converted to estimated maximum shear stress using a formula presented in Finlay et al. 2002a, considering a nozzle diameter of 0.76 mm and distance from nozzle to surface of 25 mm (Stafslien et al. 2007). Thus, the following formula appli…
Cobetia marina	Biofilm (18 h)	Intersleek® 700		52	76	±	4	Tubulent channel flow apparatus (Schultz et al. 2000)	Mieskin et al.	2012	Natural sea water (NSW) was collected from Hartlepool Marina, County Durham, UK (54.8690N; 18.200E). Shear stress applied for 5 min.
Cobetia marina	Biofilm (18 h)	Intersleek® 900		52	80	±	4	Tubulent channel flow apparatus (Schultz et al. 2000)	Mieskin et al.	2012	Natural sea water (NSW) was collected from Hartlepool Marina, County Durham, UK (54.8690N; 18.200E). Shear stress applied for 5 min.
Cobetia marina	Biofilm (18 h)	PDMS		52	76	±	4	Tubulent channel flow apparatus (Schultz et al. 2000)	Mieskin et al.	2012	Natural sea water (NSW) was collected from Hartlepool Marina, County Durham, UK (54.8690N; 18.200E). Shear stress applied for 5 min.
Halomonas pacifica	Biofilm (24 h)	Intersleek® 900	103	135	55.795	±	8.14907	Water jet apparatus (?)	Webster et al.	2010	Results presented for 4 week preleaching of the coatings. Originally reported jet impact pressure values have been converted to estimated maximum shear stress using a formula presented in Finlay et al. 2002a. Details of the water jet apparatus are not given. However, assuming similar test conditions, the following formula applies: τmax [Pa] ≈ 0.0013 • (jet impact pressure in Pa).
Halomonas pacifica	Biofilm (24 h)	Intersleek® 900	172	225	61.405	±	23.5242	Water jet apparatus (?)	Webster et al.	2010	Results presented for 4 week preleaching of the coatings. Originally reported jet impact pressure values have been converted to estimated maximum shear stress using a formula presented in Finlay et al. 2002a. Details of the water jet apparatus are not given. However, assuming similar test conditions, the following formula applies: τmax [Pa] ≈ 0.0013 • (jet impact pressure in Pa).
Navicula incerta	Biofilm (48 h)	Intersleek® 700	64	85	100			Water jet apparatus (?)	Sommer et al.	2010	Originally reported jet impact pressure values have been converted to estimated maximum shear stress using a formula presented in Finlay et al. 2002a. Details of the water jet apparatus are not given. However, assuming similar test conditions, the following formula applies: τmax [Pa] ≈ 0.0013 • (jet impact pressure in Pa). In this study, removal percentage was visually estimated.
Navicula incerta	Biofilm (48 h)	PDMS 1,000 g/mol, 10% PDMS	64	85	100			Water jet apparatus (?)	Sommer et al.	2010	Originally reported jet impact pressure values have been converted to estimated maximum shear stress using a formula presented in Finlay et al. 2002a. Details of the water jet apparatus are not given. However, assuming similar test conditions, the following formula applies: τmax [Pa] ≈ 0.0013 • (jet impact pressure in Pa). In this study, removal percentage was visually estimated.
Navicula incerta	Biofilm (48 h)	PDMS 1,000 g/mol, 5% PDMS	64	85	100			Water jet apparatus (?)	Sommer et al.	2010	Originally reported jet impact pressure values have been converted to estimated maximum shear stress using a formula presented in Finlay et al. 2002a. Details of the water jet apparatus are not given. However, assuming similar test conditions, the following formula applies: τmax [Pa] ≈ 0.0013 • (jet impact pressure in Pa). In this study, removal percentage was visually estimated.
Navicula incerta	Biofilm (48 h)	PDMS 5,000 g/mol, 10% PDMS	64	85	90			Water jet apparatus (?)	Sommer et al.	2010	Originally reported jet impact pressure values have been converted to estimated maximum shear stress using a formula presented in Finlay et al. 2002a. Details of the water jet apparatus are not given. However, assuming similar test conditions, the following formula applies: τmax [Pa] ≈ 0.0013 • (jet impact pressure in Pa). In this study, removal percentage was visually estimated.
Navicula incerta	Biofilm (48 h)	PDMS 5,000 g/mol, 5% PDMS	64	85	70			Water jet apparatus (?)	Sommer et al.	2010	Originally reported jet impact pressure values have been converted to estimated maximum shear stress using a formula presented in Finlay et al. 2002a. Details of the water jet apparatus are not given. However, assuming similar test conditions, the following formula applies: τmax [Pa] ≈ 0.0013 • (jet impact pressure in Pa). In this study, removal percentage was visually estimated.
Halomonas pacifica	Biofilm (48 h)	PDMS 10,000 g/mol, EC, 3 x ε-CL/hydroxyl	172	50	75			Automated water jet apparatus for multiwell plates (Stafslien et al. 2007)	Ekin et al.	2007	Water jet applied for 10 s, completing approx.. 20 rotations of the nozzle (rotation diameter of 7 mm). Originally reported jet impact pressure values have been converted to estimated maximum shear stress using a formula presented in Finlay et al. 2002a, considering a nozzle diameter of 0.76 mm and distance from nozzle to surface of 25 mm (Stafslien et al. 2007). Thus, the following formula appli…
Halomonas pacifica	Biofilm (48 h)	PDMS 10,000 g/mol, GC, 0 x ε-CL/hydroxyl	172	50	73			Automated water jet apparatus for multiwell plates (Stafslien et al. 2007)	Ekin et al.	2007	Water jet applied for 10 s, completing approx.. 20 rotations of the nozzle (rotation diameter of 7 mm). Originally reported jet impact pressure values have been converted to estimated maximum shear stress using a formula presented in Finlay et al. 2002a, considering a nozzle diameter of 0.76 mm and distance from nozzle to surface of 25 mm (Stafslien et al. 2007). Thus, the following formula appli…
Halomonas pacifica	Biofilm (48 h)	PDMS 10,000 g/mol, GC, 3 x ε-CL/hydroxyl	172	50	70			Automated water jet apparatus for multiwell plates (Stafslien et al. 2007)	Ekin et al.	2007	Water jet applied for 10 s, completing approx.. 20 rotations of the nozzle (rotation diameter of 7 mm). Originally reported jet impact pressure values have been converted to estimated maximum shear stress using a formula presented in Finlay et al. 2002a, considering a nozzle diameter of 0.76 mm and distance from nozzle to surface of 25 mm (Stafslien et al. 2007). Thus, the following formula appli…
Halomonas pacifica	Biofilm (48 h)	PDMS 35,000 g/mol, EC, 3 x ε-CL/hydroxyl	172	50	69			Automated water jet apparatus for multiwell plates (Stafslien et al. 2007)	Ekin et al.	2007	Water jet applied for 10 s, completing approx.. 20 rotations of the nozzle (rotation diameter of 7 mm). Originally reported jet impact pressure values have been converted to estimated maximum shear stress using a formula presented in Finlay et al. 2002a, considering a nozzle diameter of 0.76 mm and distance from nozzle to surface of 25 mm (Stafslien et al. 2007). Thus, the following formula appli…
Halomonas pacifica	Biofilm (48 h)	PDMS 35,000 g/mol, GC, 3 x ε-CL/hydroxyl	172	50	59			Automated water jet apparatus for multiwell plates (Stafslien et al. 2007)	Ekin et al.	2007	Water jet applied for 10 s, completing approx.. 20 rotations of the nozzle (rotation diameter of 7 mm). Originally reported jet impact pressure values have been converted to estimated maximum shear stress using a formula presented in Finlay et al. 2002a, considering a nozzle diameter of 0.76 mm and distance from nozzle to surface of 25 mm (Stafslien et al. 2007). Thus, the following formula appli…
Halomonas pacifica	Biofilm (48 h)	Silicon rubber A	172	50	64			Automated water jet apparatus for multiwell plates (Stafslien et al. 2007)	Ekin et al.	2007	Water jet applied for 10 s, completing approx.. 20 rotations of the nozzle (rotation diameter of 7 mm). Originally reported jet impact pressure values have been converted to estimated maximum shear stress using a formula presented in Finlay et al. 2002a, considering a nozzle diameter of 0.76 mm and distance from nozzle to surface of 25 mm (Stafslien et al. 2007). Thus, the following formula appli…
Ulva linza	Spores (45 min)	PDMS + 3.5% natural sepiolite		52	56.2475	±	4.95089	Tubulent channel flow apparatus (Schultz et al. 2000)	Beigbeder et al.	2008	Shear stress applied for 5 min.
Ulva linza	Spores (1 h)	PDMS + 20%wt 50cSt oil- flat portion of 1.5 μm deep patterned slide		56	55.7	±	4.9	Tubulent channel flow apparatus (Schultz et al. 2000)	Hoipkemeier-Wilson	2004	Shear stress applied for 5 min. For unpatterned surfaces, error propagation was applied to the values of percentage removal, considering the values of 95% confidence limits associated with the reported spore countings. Values for patterned surfaces were selected from Table II of the reference, corresponding to the minimum and maximum removal for each oil content, as well as the flat portions for …
Ulva linza	Spores (1 h)	PDMS + 20%wt 50cSt oil'- flat portion of 5 μm deep patterned slide		56	66.2	±	3	Tubulent channel flow apparatus (Schultz et al. 2000)	Hoipkemeier-Wilson	2004	Shear stress applied for 5 min. For unpatterned surfaces, error propagation was applied to the values of percentage removal, considering the values of 95% confidence limits associated with the reported spore countings. Values for patterned surfaces were selected from Table II of the reference, corresponding to the minimum and maximum removal for each oil content, as well as the flat portions for …
Ulva linza	Spores (1 h)	PDMS + 20%wt 50cSt oil- Maximum removal: 5 μm deep 5 μm wide pillar		56	65	±	3	Tubulent channel flow apparatus (Schultz et al. 2000)	Hoipkemeier-Wilson	2004	Shear stress applied for 5 min. For unpatterned surfaces, error propagation was applied to the values of percentage removal, considering the values of 95% confidence limits associated with the reported spore countings. Values for patterned surfaces were selected from Table II of the reference, corresponding to the minimum and maximum removal for each oil content, as well as the flat portions for …
Ulva linza	Spores (1 h)	PDMS + 20%wt 50cSt oil- unpatterned		56	65	±	5	Tubulent channel flow apparatus (Schultz et al. 2000)	Hoipkemeier-Wilson	2004	Shear stress applied for 5 min. For unpatterned surfaces, error propagation was applied to the values of percentage removal, considering the values of 95% confidence limits associated with the reported spore countings. Values for patterned surfaces were selected from Table II of the reference, corresponding to the minimum and maximum removal for each oil content, as well as the flat portions for …
Ulva linza	Spores (1 h)	PDMS + 5%wt 5000cSt oil- flat portion of 1.5 μm deep patterned slide		56	55.4	±	3.5	Tubulent channel flow apparatus (Schultz et al. 2000)	Hoipkemeier-Wilson	2004	Shear stress applied for 5 min. For unpatterned surfaces, error propagation was applied to the values of percentage removal, considering the values of 95% confidence limits associated with the reported spore countings. Values for patterned surfaces were selected from Table II of the reference, corresponding to the minimum and maximum removal for each oil content, as well as the flat portions for …
Ulva linza	Spores (1 h)	PDMS + 5%wt 5000cSt oil- flat portion of 5 μm deep patterned slide		56	78.1	±	1.7	Tubulent channel flow apparatus (Schultz et al. 2000)	Hoipkemeier-Wilson	2004	Shear stress applied for 5 min. For unpatterned surfaces, error propagation was applied to the values of percentage removal, considering the values of 95% confidence limits associated with the reported spore countings. Values for patterned surfaces were selected from Table II of the reference, corresponding to the minimum and maximum removal for each oil content, as well as the flat portions for …
Ulva linza	Spores (1 h)	PDMS + 5%wt 5000cSt oil- Maximum removal: 1.5 μm deep 10 μm wide pillar		56	58	±	1.7	Tubulent channel flow apparatus (Schultz et al. 2000)	Hoipkemeier-Wilson	2004	Shear stress applied for 5 min. For unpatterned surfaces, error propagation was applied to the values of percentage removal, considering the values of 95% confidence limits associated with the reported spore countings. Values for patterned surfaces were selected from Table II of the reference, corresponding to the minimum and maximum removal for each oil content, as well as the flat portions for …
Ulva linza	Spores (1 h)	PDMS + 5%wt 5000cSt oil- unpatterned		56	78	±	3	Tubulent channel flow apparatus (Schultz et al. 2000)	Hoipkemeier-Wilson	2004	Shear stress applied for 5 min. For unpatterned surfaces, error propagation was applied to the values of percentage removal, considering the values of 95% confidence limits associated with the reported spore countings. Values for patterned surfaces were selected from Table II of the reference, corresponding to the minimum and maximum removal for each oil content, as well as the flat portions for …
Ulva linza	Spores (1 h)	PDMS + 5%wt 50cSt oil- flat portion of 1.5 μm deep patterned slide		56	60.3	±	2.9	Tubulent channel flow apparatus (Schultz et al. 2000)	Hoipkemeier-Wilson	2004	Shear stress applied for 5 min. For unpatterned surfaces, error propagation was applied to the values of percentage removal, considering the values of 95% confidence limits associated with the reported spore countings. Values for patterned surfaces were selected from Table II of the reference, corresponding to the minimum and maximum removal for each oil content, as well as the flat portions for …
Ulva linza	Spores (1 h)	PDMS + 5%wt 50cSt oil- flat portion of 5 μm deep patterned slide		56	70.4	±	3.2	Tubulent channel flow apparatus (Schultz et al. 2000)	Hoipkemeier-Wilson	2004	Shear stress applied for 5 min. For unpatterned surfaces, error propagation was applied to the values of percentage removal, considering the values of 95% confidence limits associated with the reported spore countings. Values for patterned surfaces were selected from Table II of the reference, corresponding to the minimum and maximum removal for each oil content, as well as the flat portions for …
Ulva linza	Spores (1 h)	PDMS + 5%wt 50cSt oil- Maximum removal: 1.5 μm deep 5 μm wide pillar		56	63.5	±	3	Tubulent channel flow apparatus (Schultz et al. 2000)	Hoipkemeier-Wilson	2004	Shear stress applied for 5 min. For unpatterned surfaces, error propagation was applied to the values of percentage removal, considering the values of 95% confidence limits associated with the reported spore countings. Values for patterned surfaces were selected from Table II of the reference, corresponding to the minimum and maximum removal for each oil content, as well as the flat portions for …
Ulva linza	Spores (1 h)	PDMS + 5%wt 50cSt oil- unpatterned		56	70	±	5	Tubulent channel flow apparatus (Schultz et al. 2000)	Hoipkemeier-Wilson	2004	Shear stress applied for 5 min. For unpatterned surfaces, error propagation was applied to the values of percentage removal, considering the values of 95% confidence limits associated with the reported spore countings. Values for patterned surfaces were selected from Table II of the reference, corresponding to the minimum and maximum removal for each oil content, as well as the flat portions for …
Ulva linza	Spores (1 h)	PDMS, E = 0.2 MPa, Thickness = 100 μm		55	63.6289	±	4.50659	Tubulent channel flow apparatus (Schultz et al. 2000)	Chaudhury et al.	2005	Shear stress applied for 5 min.
Ulva linza	Spores (1 h)	Silastic® T2- flat portion of 1.5 μm deep patterned slide		56	57	±	3.7	Tubulent channel flow apparatus (Schultz et al. 2000)	Hoipkemeier-Wilson	2004	Shear stress applied for 5 min. For unpatterned surfaces, error propagation was applied to the values of percentage removal, considering the values of 95% confidence limits associated with the reported spore countings. Values for patterned surfaces were selected from Table II of the reference, corresponding to the minimum and maximum removal for each oil content, as well as the flat portions for …
Ulva linza	Spores (1 h)	Silastic® T2- flat portion of 5 μm deep patterned slide		56	66.7	±	2.2	Tubulent channel flow apparatus (Schultz et al. 2000)	Hoipkemeier-Wilson	2004	Shear stress applied for 5 min. For unpatterned surfaces, error propagation was applied to the values of percentage removal, considering the values of 95% confidence limits associated with the reported spore countings. Values for patterned surfaces were selected from Table II of the reference, corresponding to the minimum and maximum removal for each oil content, as well as the flat portions for …
Ulva linza	Spores (1 h)	Silastic® T2- Maximum removal: 5 μm deep 5 μm wide pillar		56	67.9	±	4	Tubulent channel flow apparatus (Schultz et al. 2000)	Hoipkemeier-Wilson	2004	Shear stress applied for 5 min. For unpatterned surfaces, error propagation was applied to the values of percentage removal, considering the values of 95% confidence limits associated with the reported spore countings. Values for patterned surfaces were selected from Table II of the reference, corresponding to the minimum and maximum removal for each oil content, as well as the flat portions for …
Ulva linza	Spores (1 h)	Silastic® T2- unpatterned		56	66	±	4	Tubulent channel flow apparatus (Schultz et al. 2000)	Hoipkemeier-Wilson	2004	Shear stress applied for 5 min. For unpatterned surfaces, error propagation was applied to the values of percentage removal, considering the values of 95% confidence limits associated with the reported spore countings. Values for patterned surfaces were selected from Table II of the reference, corresponding to the minimum and maximum removal for each oil content, as well as the flat portions for …
Ulva linza	Sporelings (6 days)	Dow Corning 3140	210	275	79.5775			Water jet apparatus (Finlay et al. 2002a) coupled with digital image analysis	Cassé et al.	2007	Semi-high-throughput method (less rigorous than Finlay et al 2002a). Originally reported jet impact pressure values have been converted to estimated maximum shear stress using a formula presented in Finlay et al. 2002a. Thus, assuming similar test conditions, the following formula applies: τmax [Pa] ≈ 0.0013 • (jet impact pressure in Pa). The first set of values for 50% removal have been interpol…
Ulva linza	Sporelings (6 days)	Intersleek® 700		50	59.9482	±	9.97161	Tubulent channel flow apparatus (Schultz et al. 2000)	Evariste et al.	2012	Shear stress applied for 5 min.
Ulva linza	Sporelings (6 days)	Intersleek® 900		50	92.492	±	2.42617	Tubulent channel flow apparatus (Schultz et al. 2000)	Evariste et al.	2012	Shear stress applied for 5 min.
Ulva linza	Sporelings (6 days)	PDMS 10,000 g/mol, EC, 0 x ε-CL/hydroxyl	93	120	99			Water jet apparatus (Finlay et al. 2002a) adapted for array panels (Cassé et al. 2007)	Ekin et al.	2007	Range of impact pressure values was 34 to 210 kPa. Please refer to the study for complete results in terms of (% removal) versus (impact pressure) and (coating). Originally reported jet impact pressure values have been converted to estimated maximum shear stress using a formula presented in Finlay et al. 2002a. Thus, assuming similar test conditions, the following formula applies: τmax [Pa] ≈ 0.0…
Ulva linza	Sporelings (6 days)	PDMS 10,000 g/mol, EC, 3 x ε-CL/hydroxyl	93	120	99			Water jet apparatus (Finlay et al. 2002a) adapted for array panels (Cassé et al. 2007)	Ekin et al.	2007	Range of impact pressure values was 34 to 210 kPa. Please refer to the study for complete results in terms of (% removal) versus (impact pressure) and (coating). Originally reported jet impact pressure values have been converted to estimated maximum shear stress using a formula presented in Finlay et al. 2002a. Thus, assuming similar test conditions, the following formula applies: τmax [Pa] ≈ 0.0…
Ulva linza	Sporelings (6 days)	PDMS 10,000 g/mol, GC, 0 x ε-CL/hydroxyl	210	275	60			Water jet apparatus (Finlay et al. 2002a) adapted for array panels (Cassé et al. 2007)	Ekin et al.	2007	Range of impact pressure values was 34 to 210 kPa. Please refer to the study for complete results in terms of (% removal) versus (impact pressure) and (coating). Originally reported jet impact pressure values have been converted to estimated maximum shear stress using a formula presented in Finlay et al. 2002a. Thus, assuming similar test conditions, the following formula applies: τmax [Pa] ≈ 0.0…
Ulva linza	Sporelings (6 days)	PDMS 10,000 g/mol, GC, 3 x ε-CL/hydroxyl	132	170	99			Water jet apparatus (Finlay et al. 2002a) adapted for array panels (Cassé et al. 2007)	Ekin et al.	2007	Range of impact pressure values was 34 to 210 kPa. Please refer to the study for complete results in terms of (% removal) versus (impact pressure) and (coating). Originally reported jet impact pressure values have been converted to estimated maximum shear stress using a formula presented in Finlay et al. 2002a. Thus, assuming similar test conditions, the following formula applies: τmax [Pa] ≈ 0.0…
Ulva linza	Sporelings (6 days)	PDMS 35,000 g/mol, EC, 0 x ε-CL/hydroxyl	132	170	99			Water jet apparatus (Finlay et al. 2002a) adapted for array panels (Cassé et al. 2007)	Ekin et al.	2007	Range of impact pressure values was 34 to 210 kPa. Please refer to the study for complete results in terms of (% removal) versus (impact pressure) and (coating). Originally reported jet impact pressure values have been converted to estimated maximum shear stress using a formula presented in Finlay et al. 2002a. Thus, assuming similar test conditions, the following formula applies: τmax [Pa] ≈ 0.0…
Ulva linza	Sporelings (6 days)	PDMS 35,000 g/mol, EC, 3 x ε-CL/hydroxyl	210	275	60			Water jet apparatus (Finlay et al. 2002a) adapted for array panels (Cassé et al. 2007)	Ekin et al.	2007	Range of impact pressure values was 34 to 210 kPa. Please refer to the study for complete results in terms of (% removal) versus (impact pressure) and (coating). Originally reported jet impact pressure values have been converted to estimated maximum shear stress using a formula presented in Finlay et al. 2002a. Thus, assuming similar test conditions, the following formula applies: τmax [Pa] ≈ 0.0…
Ulva linza	Sporelings (6 days)	PDMS 35,000 g/mol, GC, 0 x ε-CL/hydroxyl	210	275	60			Water jet apparatus (Finlay et al. 2002a) adapted for array panels (Cassé et al. 2007)	Ekin et al.	2007	Range of impact pressure values was 34 to 210 kPa. Please refer to the study for complete results in terms of (% removal) versus (impact pressure) and (coating). Originally reported jet impact pressure values have been converted to estimated maximum shear stress using a formula presented in Finlay et al. 2002a. Thus, assuming similar test conditions, the following formula applies: τmax [Pa] ≈ 0.0…
Ulva linza	Sporelings (6 days)	PDMS 35,000 g/mol, GC, 3 x ε-CL/hydroxyl	210	275	60			Water jet apparatus (Finlay et al. 2002a) adapted for array panels (Cassé et al. 2007)	Ekin et al.	2007	Range of impact pressure values was 34 to 210 kPa. Please refer to the study for complete results in terms of (% removal) versus (impact pressure) and (coating). Originally reported jet impact pressure values have been converted to estimated maximum shear stress using a formula presented in Finlay et al. 2002a. Thus, assuming similar test conditions, the following formula applies: τmax [Pa] ≈ 0.0…
Ulva linza	Sporelings (6 days)	Silastic® T2	210	275	85.9155			Water jet apparatus (Finlay et al. 2002a) coupled with digital image analysis	Cassé et al.	2007	Semi-high-throughput method (less rigorous than Finlay et al 2002a). Originally reported jet impact pressure values have been converted to estimated maximum shear stress using a formula presented in Finlay et al. 2002a. Thus, assuming similar test conditions, the following formula applies: τmax [Pa] ≈ 0.0013 • (jet impact pressure in Pa). The first set of values for 50% removal have been interpol…
Ulva linza	Sporelings (6 days)	Silicon rubber A	93	120	99			Water jet apparatus (Finlay et al. 2002a) adapted for array panels (Cassé et al. 2007)	Ekin et al.	2007	Range of impact pressure values was 34 to 210 kPa. Please refer to the study for complete results in terms of (% removal) versus (impact pressure) and (coating). Originally reported jet impact pressure values have been converted to estimated maximum shear stress using a formula presented in Finlay et al. 2002a. Thus, assuming similar test conditions, the following formula applies: τmax [Pa] ≈ 0.0…
Ulva linza	Sporelings (6 days)	Silicon rubber B	93	120	99			Water jet apparatus (Finlay et al. 2002a) adapted for array panels (Cassé et al. 2007)	Ekin et al.	2007	Range of impact pressure values was 34 to 210 kPa. Please refer to the study for complete results in terms of (% removal) versus (impact pressure) and (coating). Originally reported jet impact pressure values have been converted to estimated maximum shear stress using a formula presented in Finlay et al. 2002a. Thus, assuming similar test conditions, the following formula applies: τmax [Pa] ≈ 0.0…
Ulva sp.	Sporelings (6 days)	FR Veridian		56	80			Tubulent channel flow apparatus (Schultz et al. 2000)	Schultz et al.	2003	Shear stress applied for 5 min. On Veridian, removal increased with increasing cultivation time. Mean filament length after 6 days: ~85 μm.
Ulva linza	Sporelings (7 days)	Intersleek® 700	67	20	56.1952	±	3.83772	Automated water jet apparatus for multiwell plates (Ekin et al. 2007)	Sommer et al.	2010	No direct reference to exposure time (probably 10 s). Originally reported jet impact pressure values have been converted to estimated maximum shear stress using a formula presented in Finlay et al. 2002a, considering a nozzle diameter of 0.76 mm and distance from nozzle to surface of 25 mm (Stafslien et al. 2007). Thus, the following formula applies: τmax [Pa] ≈ 0.00030 • (jet impact pressure in …
Ulva linza	Sporelings (7 days)	Intersleek® 700	111	33	69.9013	±	2.85088	Automated water jet apparatus for multiwell plates (Ekin et al. 2007)	Sommer et al.	2010	No direct reference to exposure time (probably 10 s). Originally reported jet impact pressure values have been converted to estimated maximum shear stress using a formula presented in Finlay et al. 2002a, considering a nozzle diameter of 0.76 mm and distance from nozzle to surface of 25 mm (Stafslien et al. 2007). Thus, the following formula applies: τmax [Pa] ≈ 0.00030 • (jet impact pressure in …
Ulva linza	Sporelings (7 days)	Intersleek® 700		24	73.1071	±	6.26632	Tubulent channel flow apparatus (Schultz et al. 2000)	Mieskin et al.	2012	Shear stress applied for 5 min. NSW = Natural Sea Water. Differences between the same type of non-biofilmed control surfaces may be due to different conditioning layers associated with different media: filtered natural sea water, for comparison with NSW biofilms, and sterile culture medium, for comparison with C. marina biofilms. Additionaly, different batches of spores were used, giving rise to …
Ulva linza	Sporelings (7 days)	Intersleek® 900		10	87.5312	±	6.98255	Tubulent channel flow apparatus (Schultz et al. 2000)	Mieskin et al.	2012	Shear stress applied for 5 min. NSW = Natural Sea Water. Differences between the same type of non-biofilmed control surfaces may be due to different conditioning layers associated with different media: filtered natural sea water, for comparison with NSW biofilms, and sterile culture medium, for comparison with C. marina biofilms. Additionaly, different batches of spores were used, giving rise to …
Ulva linza	Sporelings (7 days)	Intersleek® 900 (biofilmed, C. marina)		10	74.3142	±	10.7232	Tubulent channel flow apparatus (Schultz et al. 2000)	Mieskin et al.	2012	Shear stress applied for 5 min. NSW = Natural Sea Water. Differences between the same type of non-biofilmed control surfaces may be due to different conditioning layers associated with different media: filtered natural sea water, for comparison with NSW biofilms, and sterile culture medium, for comparison with C. marina biofilms. Additionaly, different batches of spores were used, giving rise to …
Ulva linza	Sporelings (7 days)	PDMS		24	76.7624	±	14.3603	Tubulent channel flow apparatus (Schultz et al. 2000)	Mieskin et al.	2012	Shear stress applied for 5 min. NSW = Natural Sea Water. Differences between the same type of non-biofilmed control surfaces may be due to different conditioning layers associated with different media: filtered natural sea water, for comparison with NSW biofilms, and sterile culture medium, for comparison with C. marina biofilms. Additionaly, different batches of spores were used, giving rise to …
Ulva linza	Sporelings (7 days)	PDMS 10,000 g/mol, 10% PDMS	18	5	57.6206	±	12.8289	Automated water jet apparatus for multiwell plates (Ekin et al. 2007)	Sommer et al.	2010	No direct reference to exposure time (probably 10 s). Originally reported jet impact pressure values have been converted to estimated maximum shear stress using a formula presented in Finlay et al. 2002a, considering a nozzle diameter of 0.76 mm and distance from nozzle to surface of 25 mm (Stafslien et al. 2007). Thus, the following formula applies: τmax [Pa] ≈ 0.00030 • (jet impact pressure in …
Ulva linza	Sporelings (7 days)	PDMS 10,000 g/mol, 10% PDMS	67	20	85.9101	±	5.26316	Automated water jet apparatus for multiwell plates (Ekin et al. 2007)	Sommer et al.	2010	No direct reference to exposure time (probably 10 s). Originally reported jet impact pressure values have been converted to estimated maximum shear stress using a formula presented in Finlay et al. 2002a, considering a nozzle diameter of 0.76 mm and distance from nozzle to surface of 25 mm (Stafslien et al. 2007). Thus, the following formula applies: τmax [Pa] ≈ 0.00030 • (jet impact pressure in …
Ulva linza	Sporelings (7 days)	PDMS 10,000 g/mol, 10% PDMS	111	33	82.4013	±	6.6886	Automated water jet apparatus for multiwell plates (Ekin et al. 2007)	Sommer et al.	2010	No direct reference to exposure time (probably 10 s). Originally reported jet impact pressure values have been converted to estimated maximum shear stress using a formula presented in Finlay et al. 2002a, considering a nozzle diameter of 0.76 mm and distance from nozzle to surface of 25 mm (Stafslien et al. 2007). Thus, the following formula applies: τmax [Pa] ≈ 0.00030 • (jet impact pressure in …
Ulva linza	Sporelings (7 days)	PDMS 10,000 g/mol, 5% PDMS	18	5	54.8794	±	7.23684	Automated water jet apparatus for multiwell plates (Ekin et al. 2007)	Sommer et al.	2010	No direct reference to exposure time (probably 10 s). Originally reported jet impact pressure values have been converted to estimated maximum shear stress using a formula presented in Finlay et al. 2002a, considering a nozzle diameter of 0.76 mm and distance from nozzle to surface of 25 mm (Stafslien et al. 2007). Thus, the following formula applies: τmax [Pa] ≈ 0.00030 • (jet impact pressure in …
Ulva linza	Sporelings (7 days)	PDMS 10,000 g/mol, 5% PDMS	67	20	69.3531	±	4.38597	Automated water jet apparatus for multiwell plates (Ekin et al. 2007)	Sommer et al.	2010	No direct reference to exposure time (probably 10 s). Originally reported jet impact pressure values have been converted to estimated maximum shear stress using a formula presented in Finlay et al. 2002a, considering a nozzle diameter of 0.76 mm and distance from nozzle to surface of 25 mm (Stafslien et al. 2007). Thus, the following formula applies: τmax [Pa] ≈ 0.00030 • (jet impact pressure in …
Ulva linza	Sporelings (7 days)	PDMS 10,000 g/mol, 5% PDMS	111	33	70.9978	±	2.63158	Automated water jet apparatus for multiwell plates (Ekin et al. 2007)	Sommer et al.	2010	No direct reference to exposure time (probably 10 s). Originally reported jet impact pressure values have been converted to estimated maximum shear stress using a formula presented in Finlay et al. 2002a, considering a nozzle diameter of 0.76 mm and distance from nozzle to surface of 25 mm (Stafslien et al. 2007). Thus, the following formula applies: τmax [Pa] ≈ 0.00030 • (jet impact pressure in …
Ulva linza	Sporelings (7 days)	PDMS 15,000 g/mol, 10% PDMS	67	20	64.3092	±	0.87719	Automated water jet apparatus for multiwell plates (Ekin et al. 2007)	Sommer et al.	2010	No direct reference to exposure time (probably 10 s). Originally reported jet impact pressure values have been converted to estimated maximum shear stress using a formula presented in Finlay et al. 2002a, considering a nozzle diameter of 0.76 mm and distance from nozzle to surface of 25 mm (Stafslien et al. 2007). Thus, the following formula applies: τmax [Pa] ≈ 0.00030 • (jet impact pressure in …
Ulva linza	Sporelings (7 days)	PDMS 15,000 g/mol, 10% PDMS	111	33	64.8575	±	3.28948	Automated water jet apparatus for multiwell plates (Ekin et al. 2007)	Sommer et al.	2010	No direct reference to exposure time (probably 10 s). Originally reported jet impact pressure values have been converted to estimated maximum shear stress using a formula presented in Finlay et al. 2002a, considering a nozzle diameter of 0.76 mm and distance from nozzle to surface of 25 mm (Stafslien et al. 2007). Thus, the following formula applies: τmax [Pa] ≈ 0.00030 • (jet impact pressure in …
Ulva linza	Sporelings (7 days)	PDMS 15,000 g/mol, 5% PDMS	18	5	55.318	±	7.1272	Automated water jet apparatus for multiwell plates (Ekin et al. 2007)	Sommer et al.	2010	No direct reference to exposure time (probably 10 s). Originally reported jet impact pressure values have been converted to estimated maximum shear stress using a formula presented in Finlay et al. 2002a, considering a nozzle diameter of 0.76 mm and distance from nozzle to surface of 25 mm (Stafslien et al. 2007). Thus, the following formula applies: τmax [Pa] ≈ 0.00030 • (jet impact pressure in …
Ulva linza	Sporelings (7 days)	PDMS 15,000 g/mol, 5% PDMS	67	20	82.6206	±	3.28948	Automated water jet apparatus for multiwell plates (Ekin et al. 2007)	Sommer et al.	2010	No direct reference to exposure time (probably 10 s). Originally reported jet impact pressure values have been converted to estimated maximum shear stress using a formula presented in Finlay et al. 2002a, considering a nozzle diameter of 0.76 mm and distance from nozzle to surface of 25 mm (Stafslien et al. 2007). Thus, the following formula applies: τmax [Pa] ≈ 0.00030 • (jet impact pressure in …
Ulva linza	Sporelings (7 days)	PDMS 15,000 g/mol, 5% PDMS	111	33	84.9232	±	3.07017	Automated water jet apparatus for multiwell plates (Ekin et al. 2007)	Sommer et al.	2010	No direct reference to exposure time (probably 10 s). Originally reported jet impact pressure values have been converted to estimated maximum shear stress using a formula presented in Finlay et al. 2002a, considering a nozzle diameter of 0.76 mm and distance from nozzle to surface of 25 mm (Stafslien et al. 2007). Thus, the following formula applies: τmax [Pa] ≈ 0.00030 • (jet impact pressure in …
Ulva linza	Sporelings (7 days)	PDMS 5,000 g/mol, 10% PDMS	111	33	72.3136	±	4.27631	Automated water jet apparatus for multiwell plates (Ekin et al. 2007)	Sommer et al.	2010	No direct reference to exposure time (probably 10 s). Originally reported jet impact pressure values have been converted to estimated maximum shear stress using a formula presented in Finlay et al. 2002a, considering a nozzle diameter of 0.76 mm and distance from nozzle to surface of 25 mm (Stafslien et al. 2007). Thus, the following formula applies: τmax [Pa] ≈ 0.00030 • (jet impact pressure in …
Ulva linza	Sporelings (7 days)	Silastic® T2	67	20	75.0548	±	13.8158	Automated water jet apparatus for multiwell plates (Ekin et al. 2007)	Sommer et al.	2010	No direct reference to exposure time (probably 10 s). Originally reported jet impact pressure values have been converted to estimated maximum shear stress using a formula presented in Finlay et al. 2002a, considering a nozzle diameter of 0.76 mm and distance from nozzle to surface of 25 mm (Stafslien et al. 2007). Thus, the following formula applies: τmax [Pa] ≈ 0.00030 • (jet impact pressure in …
Ulva linza	Sporelings (7 days)	Silastic® T2	111	33	88.5417	±	6.25	Automated water jet apparatus for multiwell plates (Ekin et al. 2007)	Sommer et al.	2010	No direct reference to exposure time (probably 10 s). Originally reported jet impact pressure values have been converted to estimated maximum shear stress using a formula presented in Finlay et al. 2002a, considering a nozzle diameter of 0.76 mm and distance from nozzle to surface of 25 mm (Stafslien et al. 2007). Thus, the following formula applies: τmax [Pa] ≈ 0.00030 • (jet impact pressure in …
Ulva linza	Sporelings (8 days)	PDMS, E = 0.2 MPa, Thickness = 100 μm		55	81.8691	±	5.5797	Tubulent channel flow apparatus (Schultz et al. 2000)	Chaudhury et al.	2005	Shear stress applied for 5 min.
Ulva linza	Sporelings (8 days)	PDMS, E = 0.8 MPa, Thickness = 100 μm		55	81.019	±	4.29184	Tubulent channel flow apparatus (Schultz et al. 2000)	Chaudhury et al.	2005	Shear stress applied for 5 min.
Ulva linza	Sporelings (8 days)	PDMS, E = 0.8 MPa, Thickness = 100 μm		55	80.9109	±	4.20622	Tubulent channel flow apparatus (Schultz et al. 2000)	Chaudhury et al.	2005	Shear stress applied for 5 min.
Ulva linza	Sporelings (8 days)	PDMS, E = 0.8 MPa, Thickness = 430 μm		55	82.7177	±	4.42784	Tubulent channel flow apparatus (Schultz et al. 2000)	Chaudhury et al.	2005	Shear stress applied for 5 min.
Ulva linza	Sporelings (8 days)	Silastic® T2		55	50.3547	±	5.29314	Tubulent channel flow apparatus (Schultz et al. 2000)	Gudipati et al.	2005	Shear stress applied for 5 min.
Ulva linza	Sporelings (8 days)	Silastic® T2		53	67.9653	±	4.439	Tubulent channel flow apparatus (Schultz et al. 2000)	Yarbrough et al.	2006	Shear stress applied for 5 min.
Ectocarpus crouaniorum	Sporelings (14 days)	Intersleek® 700		50.0195	59.2647	±	8.97058	Tubulent channel flow apparatus (Schultz et al. 2000)	Evariste et al.	2012	Shear stress applied for 5 min.
Ectocarpus crouaniorum	Sporelings (14 days)	Intersleek® 900		8	93.7269	±	3.56704	Tubulent channel flow apparatus (Schultz et al. 2000)	Evariste et al.	2012	Shear stress applied for 5 min.
Ectocarpus sp.	Sporelings (14 days)	Intersleek® 700		8	69.8781	±	6.70731	Tubulent channel flow apparatus (Schultz et al. 2000)	Evariste et al.	2012	Shear stress applied for 5 min.
Ectocarpus sp.	Sporelings (14 days)	Intersleek® 900		8	97.1951	±	1.21952	Tubulent channel flow apparatus (Schultz et al. 2000)	Evariste et al.	2012	Shear stress applied for 5 min.
Hincksia secunda	Sporelings (14 days)	Intersleek® 700		8	87.1481	±	3.54958	Tubulent channel flow apparatus (Schultz et al. 2000)	Evariste et al.	2012	Shear stress applied for 5 min.
Hincksia secunda	Sporelings (14 days)	Intersleek® 900		8	92.7785	±	2.69278	Tubulent channel flow apparatus (Schultz et al. 2000)	Evariste et al.	2012	Shear stress applied for 5 min.
Hincksia secunda	Sporelings (14 days)	Silastic® T2		8	62.4235	±	16.5239	Tubulent channel flow apparatus (Schultz et al. 2000)	Evariste et al.	2012	Shear stress applied for 5 min.
